# Supplementary material for: The roles of density-tunable surface oxygen vacancy over bouquet-like Bi2O3 in enhancing photocatalytic activity
Source: Royal Society of Chemistry journal article supplement (doi:10.1039/c3cp54461c), 2013-11-27
Supplement: c3cp54461c.pdf [file c3cp54461c.pdf]

## Supplementary Information

### The Roles of Density-tunable Surface Oxygen Vacancy over Bouquet-like Bi<sub>2</sub>O<sub>3</sub> in Enhancing Photocatalytic Activity

Yuqi Wu and Gongxuan Lu \*

*State Key Laboratory for Oxo Synthesis and Selective Oxidation, Lanzhou Institute of Chemical Physics, Chinese*

*Academy of Sciences, Lanzhou, 730000, P. R. China.*

E-mail: gxlu@lzb.ac.cn. (G. Lu);

E-mail: wuyuqicas@163.com. (Y. Wu).

Tel/Fax: (+)81-931-4968178

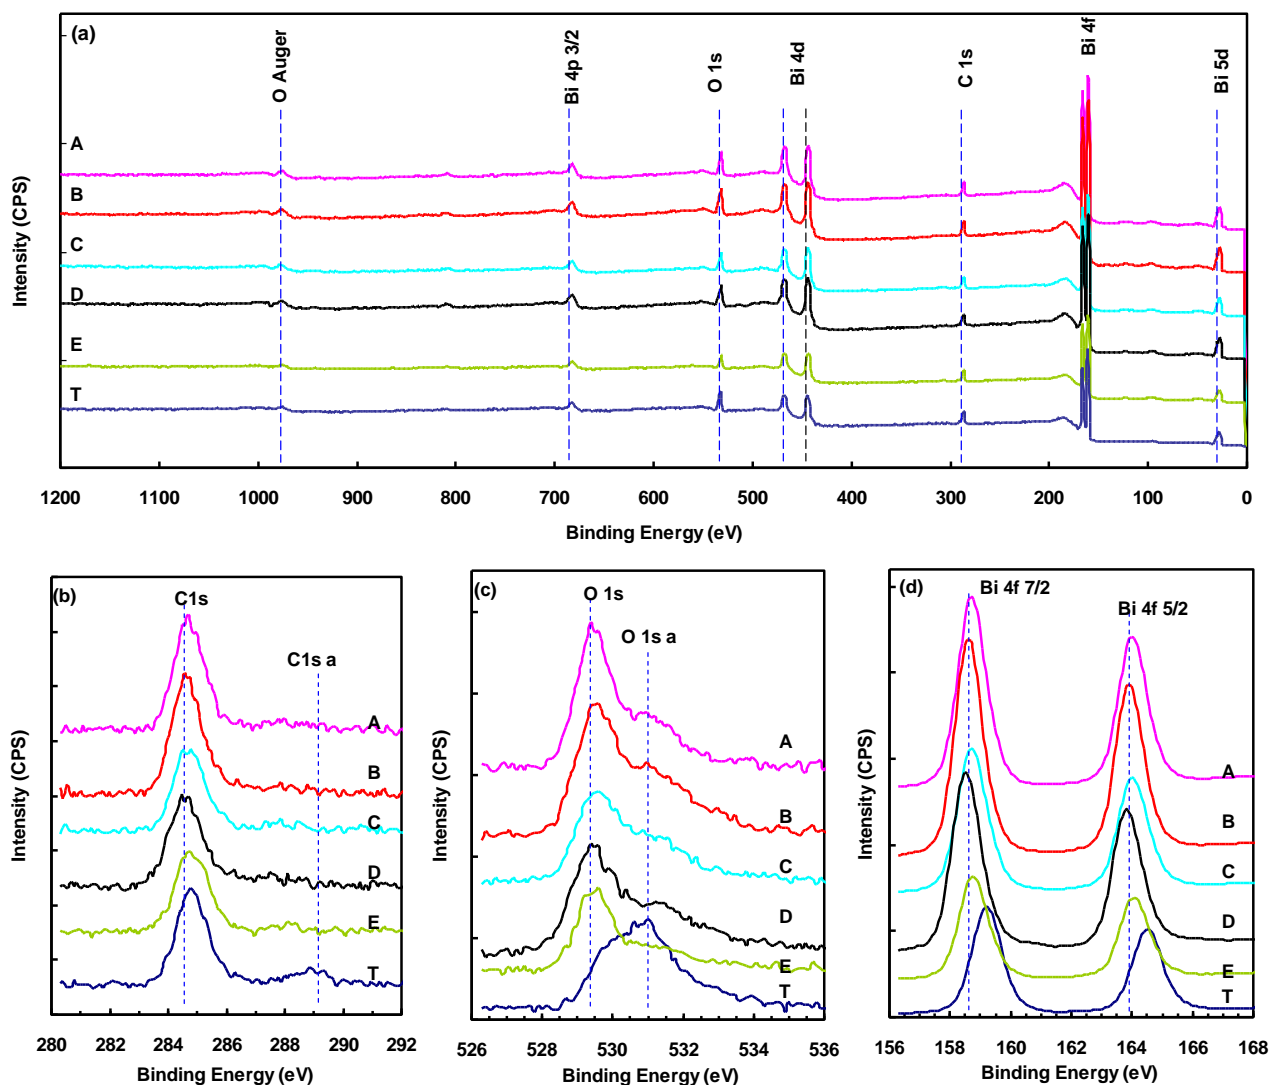

**Figure S1.** XPS spectra of rod- (Sample T) and bouquet-like  $\text{Bi}_2\text{O}_3$  (Sample A, B, C, D, and E): (a) survey scans, (b) C 1s narrow scans, (c) O 1s narrow scans, and (d) Bi 4f narrow scans.

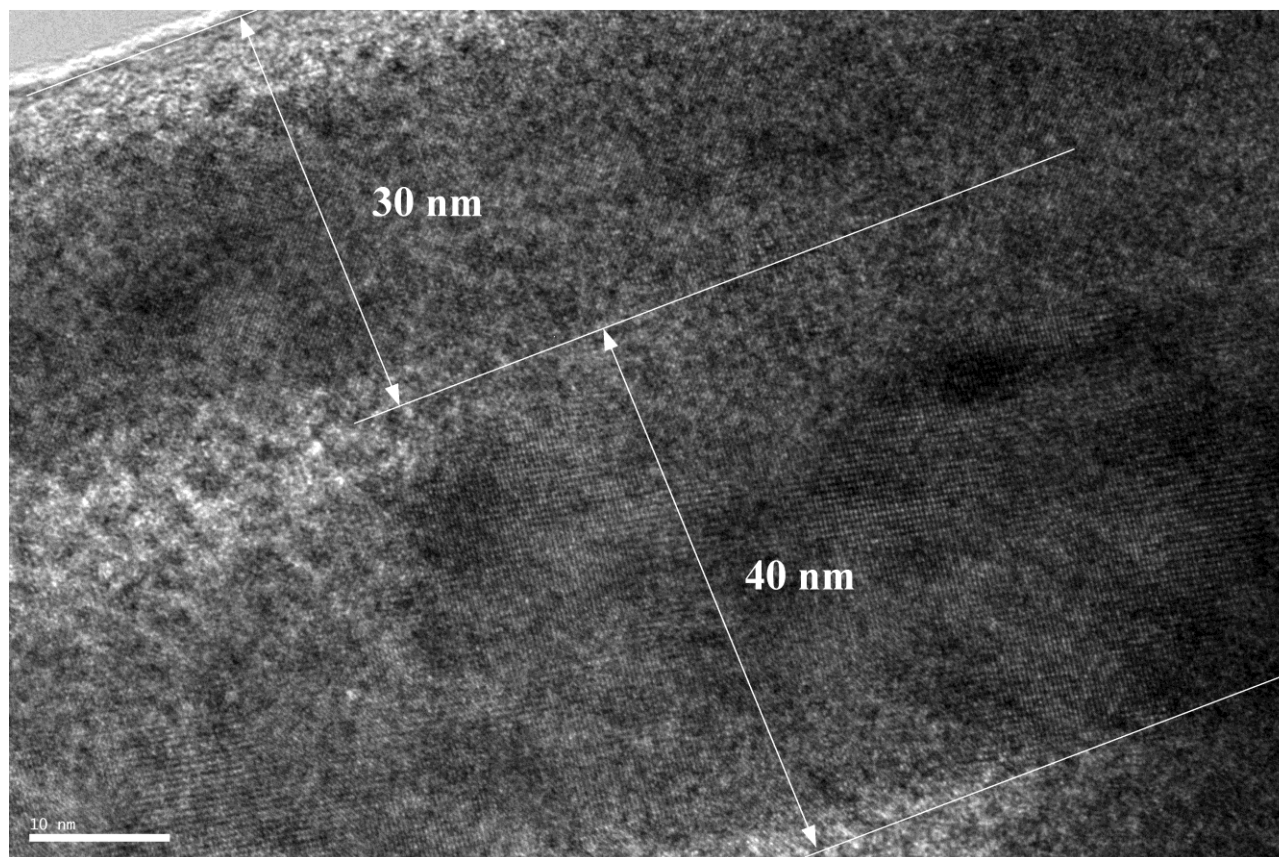

**Figure S2.** The enlarged TEM image of the tertiary structure size of bouquet- like  $\text{Bi}_2\text{O}_3$  for illuminating the self-assembly formation process.

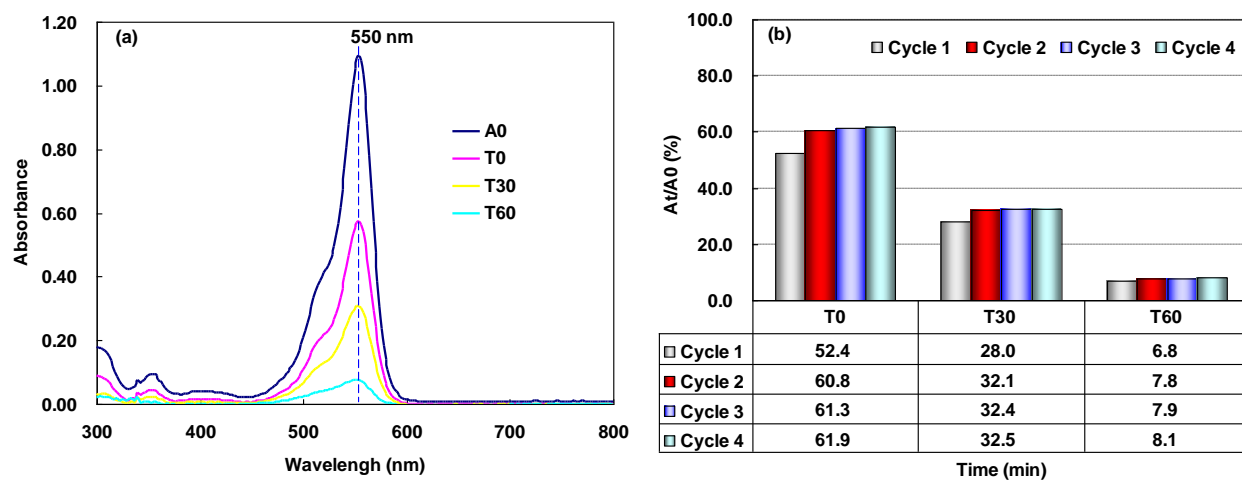

**Figure S3.** Photoactive stability of bouquet-like  $\text{Bi}_2\text{O}_3$  (Sample C used as an example): (a) the absorbance scan, (b) the absorbance with varied time after 4-cycle reaction. (The photo-decolorization ratio  $\eta=1-A_t/A_0$ )

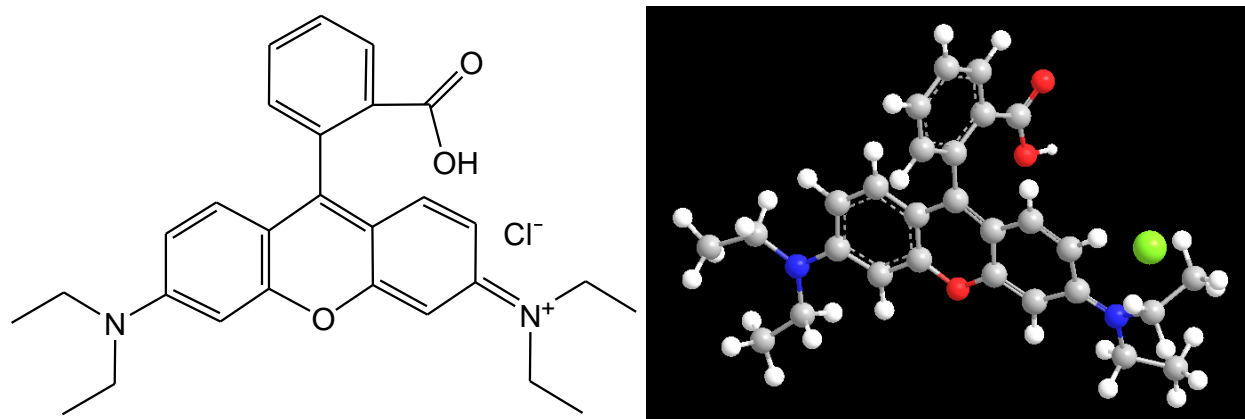

**Figure S4.** The schematic diagram of RhB constitutional formula.

**Table S1.** The estimated values of TOC analysis.

| Samples                                                       | AU    | TOC (mg·L <sup>-1</sup> ) |
|---------------------------------------------------------------|-------|---------------------------|
| Original solution of 10 <sup>-5</sup> mol·L <sup>-1</sup> RhB | 4568  | 78.40                     |
| A                                                             | 1688  | 25.01                     |
| B                                                             | 568.4 | 3.79                      |
| C                                                             | 495.4 | 3.30                      |
| D                                                             | 866.9 | 9.36                      |
| E                                                             | 904.2 | 10.05                     |
| T                                                             | 1774  | 26.27                     |

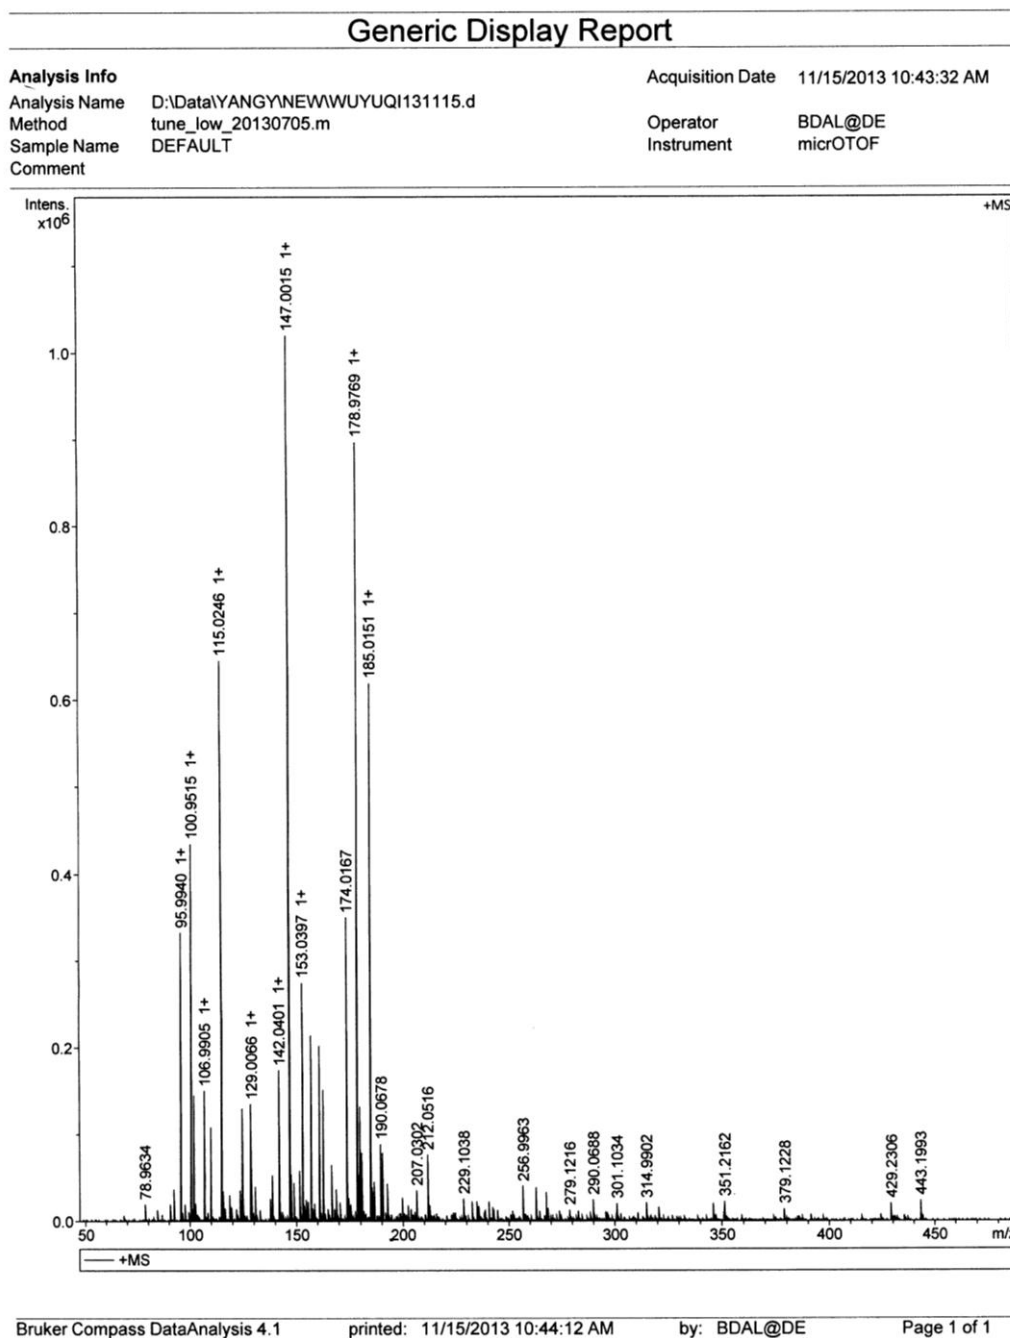

**Figure S5.** The ESI mass spectra of intermediates from RhB photo-decolorization over bouquet-like  $\text{Bi}_2\text{O}_3$  (Sample B).

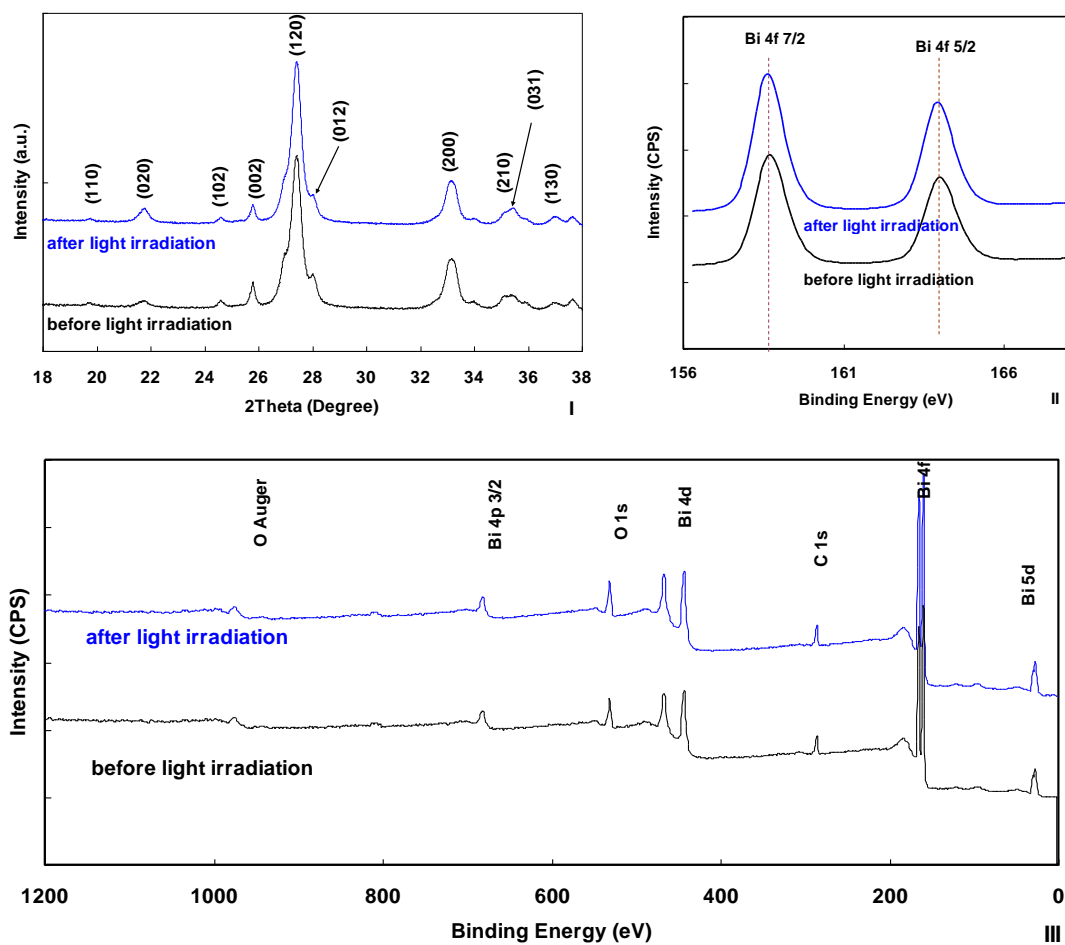

**Figure S6.** The comparison of the XRD pattern (I) and XPS spectra of bouquet-like  $\text{Bi}_2\text{O}_3$  (II: Bi 4f narrow scans III: survey scans for Sample C) before and after 4-cycle-reaction light irradiation
